1 **Title:** An isothermal method for sensitive detection of *Mycobacterium tuberculosis*  
2 *complexes* using CRISPR/Cas12a *cis*- and *trans*-cleavage

3 **Short title:** Ultrasensitive MTB diagnosis method

4 **Authors:**

5 Haipo Xu,<sup>1,2</sup> Xiaolong Zhang,<sup>1,2</sup> Zhixiong Cai,<sup>1,2,3</sup> Xiuqing Dong,<sup>1,2</sup> Geng Chen,<sup>1,2,3</sup>

6 Zhenli Li,<sup>1,2</sup> Liman Qiu,<sup>1,2</sup> Lei He,<sup>4</sup> Xiaolong Liu,<sup>1,2,3\*</sup> and Jingfeng Liu<sup>1,2,5\*</sup>

7 **Affiliations:**

8 <sup>1</sup> The United Innovation of Mengchao Hepatobiliary Technology Key Laboratory of  
9 Fujian Province, Mengchao Hepatobiliary Hospital of Fujian Medical University,  
10 Fuzhou, China;

11 <sup>2</sup> The Liver Center of Fujian Province, Fujian Medical University, Fuzhou, China

12 <sup>3</sup> School of Life Science and Technology, Xi'an Jiaotong University, Xi'an, China;

13 <sup>4</sup> College of Biological Science and Engineering, Fuzhou University, Fuzhou, China;

14 <sup>5</sup> Liver Disease Center, The First Affiliated Hospital of Fujian Medical University,  
15 Fuzhou, China

16 \* These two persons are corresponding authors

17 **Correspondence:**

18 **Xiaolong Liu**

19 Mengchao Hepatobiliary Hospital of Fujian Medical University,

20 Fuzhou, 350025

21 P. R. China

22 Tel: 0591-83705927

23 Fax: 0591-83705927

24 E-mail: [xiaoloong.liu@gmail.com](mailto:xiaoloong.liu@gmail.com)

25 **Jingfeng Liu**

26 Mengchao Hepatobiliary Hospital of Fujian Medical University,

27 Fuzhou, 350025

28 P. R. China

29 Tel: 0591-83705927

30 Fax: 0591-83705927

31 E-mail: [drjingfeng@126.com](mailto:drjingfeng@126.com)

32 **Keywords:**

33 *Mycobacterium tuberculosis*; RPA; CRISPR/Cas12a; diagnostic

34 **Abbreviations:**

35 TB: Tuberculosis

36 MTB: *mycobacterium tuberculosis*

37 CRISPR: Clustered Regularly Interspaced Short Palindromic Repeats

38 CRISPR-Cas: Clustered Regularly Interspaced Short Palindromic Repeats associated

39 protein

40 gRNA: guide RNA

41 RPA: recombinase polymerase amplification

42 HIV: human immunodeficiency virus

43 AIDS: acquired immune deficiency syndrome

44 NTM: *non-tuberculosis mycobacteria*

- 45 PCR: polymerase chain reaction
- 46 WHO: World Health Organization
- 47 LAMP: loop mediated amplification
- 48 HDA: helicase dependent amplification
- 49 SNP: single nucleotide polymorphism
- 50 PAM: protospacer adjacent motif
- 51 LOD: limit of detection
- 52 ssDNA: single-stranded DNA
- 53 **Genes:**
- 54 IS6110: Mycobacterium tuberculosis IS6110 IS-like element
- 55 IS1081: Mycobacterium tuberculosis IS1081 IS-like element
- 56

57 ***Abstract***

58 Tuberculosis is still one of the most serious infectious diseases resulting in lethal  
59 death worldwide. The traditional method is still not enough to meet the clinical  
60 requirements of rapid diagnosis, high specificity and sensitivity. Fast, sensitive and  
61 accurate detection of *mycobacterium tuberculosis* (MTB) is an urgent need for the  
62 treatment and control of tuberculosis disease. Clustered Regularly Interspaced Short  
63 Palindromic Repeats (CRISPR)-associated proteins (Cas12a) exhibits strongly  
64 nonspecific degradation ability of exogenous single-strand nucleic acid  
65 (trans-cleavage) after specific recognition of target sequence. We purified Cas12a  
66 protein and selected a proper guide RNA (gRNA) based on conserved sequences of  
67 MTB from gRNA library we designed. Then, we proposed a novel method based on  
68 recombinase polymerase amplification (RPA) and CRISPR/Cas12a nuclease system  
69 for specific and sensitive detection of MTB DNA. The assay based on fluorescence  
70 detection pattern showed 4.48 fM of limit of detection (LOD) and good linear  
71 correlation of concentration and fluorescence value ( $R^2=0.9775$ ). Also, it showed  
72 good performance in distinguishing other bacteria. Furthermore, its clinical  
73 performance was evaluated by 193 samples and showed sensitivity of 99.29%  
74 (139/140) and specificity of 100% (53/53) at 99% confidence interval, respectively,  
75 compared with culture method. The CRISPR/Cas12a system showed good specificity,  
76 excellent sensitivity and accuracy for MTB detection, and it meets requirements of  
77 MTB detection in clinical samples and has great potential for clinical translation.

78

79 Tuberculosis (TB), which is caused by *Mycobacterium tuberculosis* (MTB) and could  
80 spread through aerosol in the air, for example by coughing, remains one of the top 10  
81 causes of death and the leading cause of death from a single infectious agent (ranking  
82 above HIV/AIDS) worldwide <sup>1</sup>. Therefore, the fast, sensitive and accurate diagnosis  
83 of active TB and drug resistance (for example, rifampicin, isoniazid, pyrazinamide) is  
84 crucial both for the individual and population level to reduce morbidity, mortality and  
85 transmission among patients. Sputum smear microscopy is the primary test for TB  
86 diagnosis, but it is significantly limited by its laborious detection process and  
87 relatively low detection sensitivity of only 56% to 68%<sup>2,3</sup>. In addition, the microscopy  
88 performs poorly on HIV co-infected specimens because the amount of MTB is low in  
89 sputum specimen. Meanwhile, it cannot distinguish MTB and *non-tuberculosis*  
90 *mycobacteria* (NTM) which of patients are treated totally differently due to different  
91 pathogenicity and drug susceptibility profiles <sup>4-6</sup>, although they show similar clinical  
92 manifestation. So far, culture-based mycobacterial detection method is still the gold  
93 standard for the laboratory diagnosis of tuberculosis due to its high sensitivity,  
94 specificity and accuracy<sup>7</sup>. But, it needs extensive laboratory experiences and usually  
95 takes up to 4-6 weeks to achieve satisfied results, which does not meet the rapid test  
96 requirement, and it significantly hindered the prompt treatment and isolation patients  
97 which is crucial for disease control. Moreover, it exists the cases that some bacilli  
98 cannot be successfully cultured, which might arise error results <sup>8</sup>.

99 Genetic sequencing of MTB DNA was reported to be a more accurate strategy  
100 for TB diagnosis. The Xpert MTB/RIF system (Cepheid, USA), a polymerase chain

101 reaction (PCR) based test, is the only one accepted by WHO from 2010 for detecting  
102 TB infection and rifampicin resistance. Though it has many advantages including full  
103 automation, integration and better accuracy than microscopy or culture methods, its  
104 sensitivity for some bacilli clinical specimen is still inadequate. Furthermore, the cost  
105 of cartridges, instrumentation and maintenance of Xpert MTB/RIF system make it  
106 impossible to set-up in many high TB burden countries, which further limited its  
107 usefulness<sup>9, 10</sup>.

108 In recent years, isothermal amplification assays using loop mediated  
109 amplification (LAMP)<sup>11</sup>, helicase dependent amplification (HDA)<sup>12</sup> and recombinase  
110 polymerase amplification (RPA)<sup>13-15</sup> have been extensively applied in the field of  
111 molecular diagnosis including pulmonary TB diagnosis<sup>16-18</sup>. Especially, the RPA  
112 reaction which replaces the thermal cycles needed for PCR reaction and works at  
113 temperatures between 25°C and 42°C with three core enzymes, permits rapid DNA  
114 amplification in minutes. Recently, the RPA based methods have been used for  
115 detection of MTB and other pathogen, while it always had high false positive results  
116 in clinical samples<sup>19</sup>. To further improve specificity, long oligonucleotide probe with  
117 fluorophores and quenchers or other modifications of probe, such as biotin,  
118 tetrahydrofuran, etc, have been designed to recognize RPA amplicon for specific  
119 cleavage by nucleases, and these newly developed methods have been successfully  
120 applied for pathogen diagnosis<sup>20-22</sup>, liquid biopsy<sup>23</sup>, and SNP/genotyping<sup>24</sup>. However,  
121 the synthesis of long oligonucleotide probes with multiple modifications is cost, and  
122 different probes with the same amplified region may also affect the efficiency of RPA.

123 Especially, the base mismatches near the middle of probes or the 3'-OH end of  
124 primers might significantly affect the efficiency of RPA reaction, which could lead to  
125 reduced amplification efficiency and false positive results<sup>19, 25</sup>.

126 Microbial Clustered Regularly Interspaced Short Palindromic Repeats  
127 (CRISPR)-associated (CRISPR-Cas) adaptive immune system, consists of guide  
128 RNA(s) for target recognition and a Cas enzyme for target cleavage<sup>26-29</sup>. The  
129 sequence-specific recognition capabilities of the CRISPR-Cas system make it as a  
130 promising genome engineering tool for genome editing<sup>29, 30</sup>, cancer target therapy<sup>31</sup>,  
131 and gene therapy<sup>32</sup>. Recently, the CRISPR-Cas nuclease systems (Cas12, Cas13 and  
132 Cas14)<sup>26, 33-35</sup> also have been developed for nucleic acid detection with high  
133 sensitivity and specificity. These CRISPR-Cas nuclease systems use the gRNA to  
134 recognize the RNA (Cas13a and Cas13b) or DNA (Cas12a and Cas14) targets, then  
135 followed by activating cleavage capacity of Cas nuclease to degrade multiple foreign  
136 nucleic acid reporters for target detection. Combining with nucleic acid amplification  
137 strategy, the Cas nucleases systems have been used for highly sensitive and specific  
138 detection of nucleic acids and became as powerful tools for developing molecular  
139 diagnostic techniques<sup>26, 33, 34</sup>.

140 To achieve prompt, sensitive and specific confirmed diagnosis of MTB, herein  
141 we combined the RPA reaction with the CRISPR-Cas nuclease (Cas12a) system to  
142 develop a novel MTB DNA detection method (Fig. 1). Firstly, the sequence of MTB  
143 with protospacer adjacent motif structure (5'-TTTN-3') for Cas12/guide RNA (gRNA)  
144 recognition was selected for gRNA design. The gRNA consists of two parts, universal

145 spacer sequence (5'-UAAUUUCUACUAAGUGUAGAU-3') at the 5' end (also near  
146 the PAM structure end) and specific sequence at the 3' end. And gRNAs were selected  
147 via evaluating by multiple softwares, such as CRISPR-DT, NUPACK, Nucleotide  
148 BLAST etc. Then the feasibility of Cas12a/gRNA trans-cleavage reaction was  
149 validated by the purified Cas12a. Subsequently, the suitable amplicon screening was  
150 performed and tested to effectively avoid false amplification of RPA. In the  
151 Cas12a/gRNA trans-cleavage fluorescence for MTB assay, in the presence of MTB  
152 DNA, they could be amplified by RPA reaction. Later, through Cas12a/gRNA  
153 complexes binding to amplified MTB DNA, Cas12a mediated nonspecific  
154 degradation of nonspecific fluorescent probes, which were polythymidine  
155 oligonucleotides with fluorophore at the 5' end and quencher at the 3' end as MTB  
156 DNA reporters, could release the fluorophores from the quenchers to increase  
157 fluorescence intensities for detection. Here proposed a novel isothermal method based  
158 on RPA and CRISPR-Cas system which has very low limitation on MTB detection in  
159 our model testing system, such as 4.48 fM of LOD, range over 6 orders of magnitude  
160 ( $R^2=0.9775$ ), and could be applied to practical applications on clinical samples with  
161 excellent specificity, sensitivity and accurate, which are comparable with the result to  
162 the gold standard of culture method.

163

## 164 ***Materials and Methods***

### 165 ***Target Selection and gRNA Design for MTB-Cas12a System***

166 MTB-specific fragment of the insertion sequence IS1081, which exists in all



167 *Mycobacterium tuberculosis complex*<sup>36</sup>, was selected as the target sequence for  
168 design of gRNA to target MTB and RPA reaction primers. To obtain the suitable guide  
169 RNA for MTB, gRNAs targeting IS1081 dsDNA were designed and scored by  
170 CRISPR-DT online software for Cpf1 (Cas12a)  
171 ([http://bioinfolab.miamioh.edu/CRISPR-DT/interface/Cpf1\\_main.php](http://bioinfolab.miamioh.edu/CRISPR-DT/interface/Cpf1_main.php)), and target  
172 efficiency less than 0.6 was excluded. Meanwhile, the second structure and homology  
173 of remaining gRNAs were further evaluated by NUPACK (<http://www.nupack.org/>)  
174 and Nucleotide BLAST  
175 ([https://blast.ncbi.nlm.nih.gov/Blast.cgi?PROGRAM=blastn&PAGE\\_TYPE=BlastSearch&LINK\\_LOC=blasthome](https://blast.ncbi.nlm.nih.gov/Blast.cgi?PROGRAM=blastn&PAGE_TYPE=BlastSearch&LINK_LOC=blasthome)), respectively. Afterwards, RPA primers were designed  
176 through Primer Premier 5.0 software and selected using agarose gel electrophoresis  
177 according to the design manual of TwistAmp Assay (TwistDx Ltd., England)  
178 (<https://www.twistdx.co.uk/docs/default-source/RPA-assay-design/twistamp-assay-design-manual-v2-5.pdf?sfvrsn=29>).  
179  
180

181 All RNA, IS1081 or IS6110 and modified DNA oligo were synthesized by  
182 General Biosystems (Anhui, China). Plasmids were obtained from the construct that  
183 the insert sequence IS1081 (Genbank ID: CP003248.2) and IS6110 (Genbank ID:  
184 X17348.1) were put into vector PUC57 respectively. Sequence information can be  
185 seen in the Supplement Data. The fluorescent polyoligonucleotides probe (ssDNA-FQ)  
186 was labeled with a fluorescent dye at the 5' end and a quenching group at the 3' end  
187 then purified with HPLC. The fluorescence could be detected only when the  
188 fluorescent dye and quenching group were separated. Forward and Reverse primers

189 for RPA and non-specific single strand DNA (ssDNA, non-target) for Cas12a/gRNA  
190 trans cleavage reaction were obtained from Sangon Biotech (Shanghai, China) with  
191 PAGE purification. All DNA/RNA oligonucleotides and plasmids were diluted with  
192 RNase-free water and the concentrations were determined by Nanodrop 200 (Thermo  
193 Fisher, USA). All of these were stored at -20°C until use. The sequences of  
194 DNA/RNA oligonucleotides used in the assay were shown in Table 1.

195

### 196 ***Feasibility of Purified Cas12a for MTB Detection***

197 The DNA plasmid encoding Cas12a (also named Cpf1) with 6×His-tag,  
198 maltose-binding protein (MBP) and TEV protease cleavage site was selected for  
199 LbCas12a expression. The plasmid 6His-MBP-TEV-huLbCpf1 (plasmid # 90096)  
200 (see Figure.1 and Supplementary M3 in the Supplement Data) was purchased from  
201 Addgene. After extracted from amplified strains, the plasmids were transformed into  
202 BL21(DE3) pLysS Chemically Competent Cells (TransGen Biotech). Then  
203 transformed strains were recovered from Luria-Bertani solid growth media and turned  
204 to 5 mL Luria-Bertani liquid growth media. After that, the LbaCas12a protein was  
205 expressed and purified according to Chen's method <sup>26</sup>. Briefly, a 5 mL starter culture  
206 was grown in Luria-Bertani liquid growth media (LB, containing of 10 g/L tryptone, 5  
207 g/L yeast extract, 10 g/L NaCl, pH 7.0, Sigma) at 25°C overnight, and then further  
208 transferred into 1 L of LB and inoculated for growth at 37°C under 300 rpm shaking  
209 until the OD<sub>600</sub> approximately reach to 0.6. Afterwards, all bacterium was cooled  
210 down and supplemented with 500 μM isopropyl-1-thio-β-D-galactopyranoside (IPTG,

211 TransGen Biotech) at 16°C for 16 h to allow protein expression. After centrifugation  
212 at 5200 rpm for 30 min at 4°C, the bacterial precipitation was harvested and stored at  
213 -80°C until use.

214 The protein purification was performed at 4°C. Firstly, the bacterial precipitation was  
215 crushed and lysed by sonication in Lysis buffer (50 mM Tris-HCl, 500 mM NaCl, 5%  
216 (v/v) glycerol, 1 mM TCEP, 0.5 mM PMSF and 0.25 mg/mL lysozyme, pH 7.5). After  
217 centrifugation, the supernatant was filtered via a Stericup 0.22 µm filter (EMD  
218 Millipore). The filtered supernatant was pipetted to Ni-NTA resin (GE) for 30 min,  
219 and washed with lysis buffer. Then, the resin was resuspended in 1×TEV digestion  
220 buffer (50 mM Tris-HCl, 50 mM NaCl, 0.5 mM EDTA, 1 mM DTT, pH 8.0) with 250  
221 units of TEV protease (Beyotime Biotechnology) overnight at 4°C with rotation. To  
222 obtain purer proteins, the steps on Ni-NTA resin was repeated. The protease treated  
223 LbCas12a was dialyzed in Buffer A (20 mM Tris-HCl, 125 mM KCl, 5% glycerol, 1  
224 mM TCEP, pH 7.5) for three times at 4°C, and further purified on a 5 mL HiTrap SP  
225 HP sepharose column (GE Healthcare). After washing with three column volumes of  
226 Buffer A, LbCas12a was eluted using a linear gradient from 0-100% Buffer B (20 mM  
227 Tris-HCl, 1 M KCl, 5% glycerol, 1 mM TCEP, pH 7.5) over 20 column volumes. The  
228 eluted proteins were further purified on Superdex 200 column (GE Healthcare) with  
229 elution Buffer (20 mM Tris-HCl, 200 mM KCl, 5% glycerol, 1 mM TCEP, pH 7.5).  
230 The existence of LbCas12a protein was confirmed by SDS-PAGE and Coomassie  
231 Blue staining, and then mixed with equal volume of glycerol after quantification and  
232 stored at -20°C for further usage. To test the *cis*- and *trans*-cleavage activity of

233 purified LbCas12a protein and the feasibility of Cas12/gRNA trans cleavage for MTB  
234 detection, we were observing the alteration of amount and integrity of substrates and  
235 nonspecific single strand DNA by 4% agarose gel electrophoresis and the  
236 fluorescence intensity was collected by detector with/out target plasmid, gRNA or  
237 non-target ssDNA. The Cas12a/gRNA trans-cleavage for MTB detection assay was as  
238 follows: 50 nM LbCas12a incubating with 36 nM IS1081-gRNA, 80 ng IS1081  
239 plasmid and 50 nM non-target ssDNA (replaced with ssDNA-FQ in Cas12a/gRNA  
240 fluorescence assay) in 1× reaction buffer (50 mM NaCl, 10 mM Tris-HCl, 10 mM  
241 MgCl<sub>2</sub>, 100 µg/mL BSA, pH 7.9), incubated at 37°C for 2 h.

242

#### 243 *Mycobacterium tuberculosis (MTB) Detection by Cas12a Fluorescence Assay*

244 To improve signal amplification efficiency and simplify operation, 1 µL of DNA  
245 extracted from amplified clone strains as template was added into RPA reaction  
246 mixture of 12.5 µL volume. RPA reaction mixture including 0.24µM~0.72µM  
247 forward and reverse primers, 1.8 mM dNTP, 1×Reaction Buffer, 1×Basic E-mix,  
248 0.625 µL 20×Core Reaction Mix, 1 µL genome, and 14 mM MgOAc and DEPC water  
249 up to 12.5 µL and incubation at 37°C~42°C for 1 h. According to the design manual  
250 of TwistAmp (TwistDx Ltd., England) assay, multiplex sets of RPA primers were  
251 selected as candidates, including primers from published literature<sup>18,37</sup> (see Table.1 in  
252 the Supplemental Data) and tried to get best conditions from RPA reaction *via*  
253 optimization for concentration of dNTP, Mg<sup>2+</sup>, primers and reaction temperature with  
254 TwistAmp® Liquid Basic/Basic RT (TwistDx, England).

255 After RPA reaction finished at one hour, 7.5  $\mu$ L Cas12a/gRNA mixtures of 36  
256 nM gRNA, 50 nM ssDNA-FQ, 50 nM Cas12a in 1 $\times$  reaction buffer was added into  
257 the cap of RPA reaction tube to the final volume of 20  $\mu$ L. Then transient high-speed  
258 centrifugation was performed to mix RPA productions with Cas12a/gRNA system.  
259 The Cas12a/gRNA trans-cleavage fluorescence reaction was incubated at 37°C for 2  
260 hours and its fluorescence was collected every 1.25 minutes by fluorescence detector  
261 (Applied Biosystems 7500 Real-Time PCR System in this study) during reaction.

262 As we defined, positive result of sample was refined as that the fluorescence  
263 intensity collected by detector was 1.5 times more than that of negative control.  
264 Others were negative values of samples. Negative control was non-MTB DNA as  
265 template for Cas12a/gRNA trans-cleavage fluorescence assay.

266

### 267 ***Performance of MTB-Cas12a Fluorescence Assay***

268 For evaluation the sensitivity of Cas12a/gRNA for MTB fluorescence assay, a series  
269 of gradient dilution concentration of IS1081 plasmid from 8960 pM to 44.8 fM were  
270 prepared with 1  $\mu$ L volume as RPA template. Meanwhile, no-MTB DNA was used as  
271 negative control and all of them were performed in three replicates. Total DNA mass  
272 for the assay was determined following formula:  $M/5-7 \times (4.38 \times 10^6 \times 660) = \mu\text{g}/\mu\text{L}$ . M  
273 is concentration of IS1081 plasmid, 5-7 is number of copies of IS1081 per MTB  
274 genome and  $4.38 \times 10^6$  is approximately number of DNA length of *M. bovis* BCG. The  
275 specificity of the assay was obtained by analyzing at least 448 fM genomic DNA of  
276 target MTB, with/ or not closely related species from clinical isolates and standard

277 strains.

278

### 279 ***Clinical Performance Evaluation of MTB-Cas12a Fluorescence assay***

280 The practical performance evaluation of the MTB detection assay was carried out via  
281 Cas12a trans-cleavage fluorescence system using a total of 194 clinical sputum  
282 samples, which were randomly collected from Fuzhou Center for Disease Control and  
283 Prevention in 2013~2016 with one sample came from one person, including patients  
284 with similar signs and symptoms consistent with pulmonary TB. All sample culture  
285 results, including 140 culture-positive results and 54 culture-negative results, were  
286 unknown for operator firstly. Genome of all samples were extracted using QIAGEN  
287 nucleic acid extraction Kit and the concentrations were measured via Nanodrop 2.0  
288 and then stored at -20°C before test. The 194 clinical samples were detected by  
289 Cas12a/gRNA trans-cleavage fluorescence assay and the data analysis was carried out  
290 according to the above criteria.

291

### 292 ***Data Analysis***

293 All the data analysis was performed with SPSS version 2.2 and Origin Lab version 8.0,  
294 including ROC area, R square etc. Each experiment was repeated at 3 times for each  
295 sample.

296

### 297 ***Results***

#### 298 ***Design of Guide RNA of MTB***

299 To ensure the coverage on all MTB species, the target insertion sequence IS1081 was  
300 selected for the assay and gRNAs targeting *Mycobacterium tuberculosis* were  
301 designed. Principally, there are numbers of gRNAs corresponding to amounts of PAM  
302 structure existing in the insert sequence IS1081. Actually, different gRNAs had  
303 different target efficiency of Cas12a/gRNA system and not all predicted gRNAs were  
304 suitable for targeting MTB. Scores of target efficiency for gRNAs were evaluated by  
305 Cpf1-CRISPR-DT online software and range from 0.7061 to 0.97 was selected after  
306 excluding that of less than 0.6, and nine gRNAs were remained. In the end, we  
307 selected one that the score of target efficiency was 0.7061 based on unobtrusive  
308 secondary structure under reaction temperature and specificity of gRNA spacer for  
309 MTB. Especially, the spacer of MTB-specific sequence of gRNA was conserved  
310 region of IS1081 according to previous study and our sequence blasting. The  
311 sequences of designed IS1081 gRNAs and corresponding score of target efficiency for  
312 MTB genome were shown Table.2 in Supplemental Data.

313

#### 314 ***Feasibility Analysis of Purified Cas12a for MTB Detection***

315 The gRNA-directed DNA binding and following activation of single-stranded DNA  
316 (ssDNA) trans-cleavage activity of Cas12a protein are vital properties for accurate  
317 recognition of target DNA for detection. The activity level of Cas12a protein directly  
318 determines the limit of detection of our Cas12a/gRNA trans-cleavage detection assay.  
319 As seen in Fig 2, when it exists IS1081 plasmid as template, the Cas12a/gRNA system,  
320 mixture of IS1081 gRNA and Cas12a protein, could degrade the target IS1081

321 plasmid *in cis* and single strand DNA *in trans*, resulting in reduction of the number of  
322 targets and non-target ssDNA (as reporter) in Cas12a/gRNA system or increase  
323 fluorescence intensity in Cas12a/gRNA fluorescence detection system. Excitingly, we  
324 observed IS1081 plasmid and ssDNA reporters were cleaved almost at the same time.  
325 These results suggested that the cis- and trans-cleavage activity ability of purified  
326 Cas12a protein is quite high and Cas12a/gRNA system for MTB detection is feasible.

327

### 328 ***Optimization of Cas12a Fluorescence Assay for MTB***

329 In order to simplify operation to achieve “one-pot” detection pattern and improve  
330 reaction efficiency, the volume of RPA reaction was controlled under 12.5  $\mu\text{L}$  and then  
331 added compositions of Cas12a/gRNA system to the final volume of 20  $\mu\text{L}$  for  
332 Cas12a/gRNA trans-cleavage fluorescence assay. Prominently, the RPA reaction  
333 conditions were optimized to maximize amplification efficiency, including reaction  
334 temperature, concentration of dNTP and primers and  $\text{Mg}^{2+}$ . As shown in Fig. 3  
335 (details can be seen in Figure.2 in the Supplemental Data), we found 0.48  $\mu\text{M}$  forward  
336 and reverse primers and 28 mM MgOAc of RPA reaction were mainly influence  
337 factors for Cas12a/gRNA trans-cleavage fluorescence assay, and the assay obtained  
338 higher fluorescence intensity under optimized conditions using the same concentration  
339 of target. Therefore, these conditions were used in the following experiments for MTB  
340 detection.

341

### 342 ***Performance of Cas12a Fluorescence Assay for MTB***



343 To evaluate the ability of MTB-Cas12a trans-cleavage fluorescence assay, a series of  
344 gradient concentration of diluted IS1081 plasmids and genome of pathogens that may  
345 infect human respiratory tract were tested. For the sensitivity of MTB-Cas12a  
346 fluorescence assay, the fluorescence accumulation value of the assay decreased  
347 gradually with the decrease of concentration of IS1081 plasmid, and the limit of  
348 detection (LOD) for IS1081 was 4.48 fM (Fig. 4A). According to the formula  
349 depicted above, it was equivalent to 2.59-1.85  $\mu\text{g/L}$  of genome of *M. bovis* BCG  
350 strain based on formula above from clinical samples. Comparing to RPA method<sup>18</sup> for  
351 IS1081 of MTB detection with LOD of 20 fg for 50 $\mu\text{L}$  volume, it achieved four  
352 orders of magnitude higher and got attogram level which would dramatically promote  
353 positive detection rate. Meanwhile, the fluorescence value was proportional to the  
354 logarithm value of target concentrations over 6 orders of magnitude. The regression  
355 equation was  $Y=87983.47X+1.29307E6$  with R square of 0.9775 (Fig. 4B). It was  
356 helpful to quantify MTB DNA accurately, especially regarding to low concentration  
357 of MTB DNA as substrate.

358 To assess the specificity of the MTB-Cas12a fluorescence assay, genome of  
359 samples from a panel of NTM and pathogens which may infect human respiratory  
360 tract or their clinical symptoms similar to TB were tested. Three replicates were  
361 performed and 500 pg of DNA from either *M. bovis* BCG or *M. tuberculosis* H37Rv  
362 was used as positive template controls for each batch. Consequently, as shown in Fig.  
363 4C, according to the judgment of criteria above, no positive results were obtained  
364 from the tested DNA except for the genome of MTB strains, indicating the high

365 specificity of MTB-Cas12a fluorescence assay for MTB detection.

366 To evaluate the clinical diagnostic performance of the MTB-Cas12a assay, 193  
367 patient samples (140 positive and 53 negative for MTB) which had been confirmed by  
368 the gold standard culture method were tested. Consequently, the fluorescence assay  
369 successfully detected 139 positive samples and 53 negative samples among 140  
370 positive samples and 53 negative samples for MTB culture method. The detection  
371 accuracy of the assay based on 193 samples showed sensitivity of 99.29% (139/140)  
372 and specificity of 100% (53/53) (Table 2). Its performance was nearly similar to  
373 culture method except that one of culture-positive sample was failed to be detected  
374 whose fluorescence intensity was lower 1.5 times than that of negative result. Maybe  
375 this one failed to be detected by the assay due to the low concentration of genome  
376 and/or it was degraded in storage or during deliver process. Especially, the major  
377 reason could be that the MTB target for guide RNA recognition exist mutation  
378 resulting in none-complete hybridization, namely “turn-off” effect. As far as we can  
379 infer, it may be resolved by the modification of gRNA covering mutation site, such as  
380 LNA or leap over, similar to the processed methods of PCR and RPA for detection of  
381 mutation. But it needs to be proved in the future. In addition, Cas12a/gRNA trans  
382 cleavage fluorescence assay for MTB detection was required an average time of 4h,  
383 which including 1h of MTB DNA extraction, 1h for MTB DNA amplification by RPA  
384 and 2h for detection of Cas12a/gRNA system. It showed a significant advantage over  
385 culture method which needs few days, and a little slow compared to RPA method for  
386 MTB DNA detection which needs 1~2 h totally.

387 ***Discussion***

388 Rapid and sensitive detection method remains a challenge for clinical MTB diagnosis.

389 Positive results of sputum smear microscopy were required at least five thousand of

390 bacteria every milliliter and skilled technician. And culture method for MTB detection

391 takes up to a few weeks and relatively low detection rate. They are not feasible for

392 rapid molecular diagnostic of MTB in clinical applications. Rapid and sensitive MTB

393 DNA detection method was attempted to be improved previously, such as automatic

394 integration plate based PCR method—GeneXpert, RPA, etc. Unfortunately, they also

395 brought some side effects which were similar to the original disadvantages and were

396 not benefit for clinical MTB diagnosis. For example, continuous power input for

397 temperature rising and falling and sample volume of 500  $\mu$ L were required for

398 GeneXpert. In contrast, Cas12a trans cleavage fluorescence assay for MTB can occur

399 at 37°C which not needs a thermos-cycler and it could obtain positive results under

400 low volume of MTB sample (100~200  $\mu$ L). Meanwhile, it estimated to be 0.6138

401 dollars every sample<sup>33</sup> comparing to 35~50 dollars for one sample of one cartridge

402 using GeneXpert.

403 In this study, by optimizing the conditions of RPA reaction and Cas12a/gRNA system,

404 we established one ultrasensitive method for Cas12a trans-cleavage fluorescence

405 assay that could obtain 2.59-1.85  $\mu$ g/L of limit of MTB genome (5-7 copies of IS1081

406 per MTB genome) detection from clinical samples. Although IS6110 is in multiple

407 copies of up to 25 per genome of MTB and was used to be target in several

408 commercial kits, such as Xpert MTB/RIF, the assay integrated the advantages of

409 polymerase mediated DNA amplification and Cas12a mediated enzymatic signal  
410 amplification to compensate relatively low copies of IS1081 in 5-7 repeats per  
411 genome, and we proved that our Cas12a/gRNA system could detect MTB DNA with  
412 ultralow LOD. Also, Cas12a/gRNA system for IS1081 can strictly recognize MTB  
413 genome with PAM structure, which showed high specificity for target. Moreover, our  
414 study on 193 samples highlights the potential of Cas12a/gRNA as an ultra-sensitive,  
415 promising assay for diagnosis of clinical tuberculosis, in spite of miss detection of one  
416 sample of culture-positive for MTB which might due to the existence of mutation in  
417 the recognition sequence of Cas12-gRNA or low concentration of MTB DNA. So, in  
418 order to reduce the false negative possibility, spacer sequence of gRNA should be  
419 avoided from region with mutation sequences or SNP, especially mutation closes to  
420 PAM sequence.

421 In addition, there are also some limitations in our established Cas12a  
422 fluorescence assay. Firstly, it takes nearly twice time to get result compared with  
423 Xpert MTB\RIF. This may be reason the assay got ultra-sensitivity. But the time  
424 consumed totally could be controlled under the acceptable range for clinical diagnosis.  
425 Secondly, the Cas12a trans-cleavage fluorescence is detected by fluorescence detector  
426 but not visual readout that requires no additional devices. Finally, apart from  
427 diagnosis, drug resistance is also increasingly severe in the world for treating MTB  
428 patients. It is an urgent need to analyze mutations of drug susceptibility for one- or  
429 even second-line drugs via sensitive detection methods. With the natural  
430 characteristics of sensitive signal amplification of Cas/gRNA system, it has the

431 potential to detect multiple mutations related to drug response. Ultra-sensitive and  
432 specific Cas12a/gRNA system combining polymerase mediated DNA amplification  
433 for both pathogen and drug resistance detection would permit the precise approach to  
434 control tuberculosis infection.

435 In a word, we have developed a CRISPR-Cas12a based fluorescence assay by  
436 combining isothermal recombinase polymerase amplification with Cas12a  
437 trans-cleavage activity, which could be activated by target specific DNA with high  
438 sensitivity and selectivity for rapid detection of pathogen *Mycobacterium tuberculosis*  
439 from clinical samples comparing to gold standard culture method which needs few  
440 days and extensive labor work. It is helpful to use this assay to prompt the confirmed  
441 diagnosis of mycobacterium tuberculosis complexes from none mycobacterium  
442 including NTM in clinical settings. But, in future, multi-center prospective study is  
443 needed to provide deeper understanding on its potential usage for clinical diagnosis.

444

#### 445 **Acknowledgments**

446 This work was supported by the National Natural Science Foundation of China (Grant  
447 No. 21605021 and 21705022), the China Postdoctoral Science Foundation, the  
448 Scientific Foundation of Fujian Health Department (Grant No. 2019-1-87), the  
449 Scientific Foundation of Fuzhou Science and Technology Department (Grant No.  
450 2019-S-90).

451

## 452     **References**

- 453     1.     World Health Organization (2018) Global Tuberculosis Report.
- 454     2.     World Health Organization (2009) Global Tuberculosis Report.
- 455     3.     Denkinger CM, Kik SV, Madhukar P: Robust, reliable and resilient: designing molecular  
456     tuberculosis tests for microscopy centers in developing countries. *Expert Review of Molecular*  
457     *Diagnostics* 2013, 13:763-767.
- 458     4.     Griffith DE, Timothy A, Brown-Elliott BA, Antonino C, Charles D, Fred G, Holland SM, Robert H,  
459     Gwen H, Iademarco MF: An official ATS/IDSA statement: diagnosis, treatment, and prevention  
460     of nontuberculous mycobacterial diseases. *Am J Respir Crit Care Med* 2007, 175:367-416.
- 461     5.     However, Pulmonary ATO: Species Identification and Clarithromycin Susceptibility Testing of  
462     278 Clinical Nontuberculosis Mycobacteria Isolates. *Biomed Research International* 2015,  
463     2015:506598.
- 464     6.     Wang X LH, Jiang G, Zhao L, Ma Y, Javid B, Huang H.: Prevalence and drug resistance of  
465     nontuberculous mycobacteria, northern China, 2008-2011. *Emerging Infect Dis* 2014,  
466     20:1252-1253.
- 467     7.     Parrish NM, Carroll KC: Role of the clinical mycobacteriology laboratory in diagnosis and  
468     management of tuberculosis in low-prevalence settings. *Journal of Clinical Microbiology* 2011,  
469     49:772-776.
- 470     8.     Sgaragli G, Frosini M: Human Tuberculosis I. Epidemiology, Diagnosis and Pathogenetic  
471     Mechanisms. *Current Medicinal Chemistry* 2016, 23:2836-2873.
- 472     9.     Machado Diana CI, Viveiros Miguel,: Advances in the molecular diagnosis of tuberculosis:  
473     From probes to genomes. *Infect Genet Evol* 2019, 72:93-112.
- 474     10.    World Health Organisation (2010) Strategic and Technical Advisory Group for Tuberculosis  
475     Report of 10th Meeting. Geneva.
- 476     11.    Nimitphak T, Kiatpathomchai W, Flegel TW: Loop-mediated isothermal amplification of DNA.  
477     *Nucleic Acids Research* 2000, 28:E63.
- 478     12.    Vincent M, Xu Y, Kong H: Helicase-dependent isothermal DNA amplification. *Embo Reports*  
479     2004, 5:795-800.
- 480     13.    Piepenburg O, Williams C, Stemple D, Na: DNA detection using recombination proteins. *Plos*  
481     *Biology* 2006, 4:1115-1121.
- 482     14.    Li J, Macdonald J, Stetten FV: Review: a comprehensive summary of a decade development of  
483     the recombinase polymerase amplification. *Analyst* 2018, 144:31-67.
- 484     15.    Daher RK, Stewart G, Boissinot M, Bergeron MG: Recombinase Polymerase Amplification for  
485     Diagnostic Applications. *Clinical Chemistry* 2016, 62:947-958.
- 486     16.    Boehme CC, Pamela N, German H, Rubhana R, Zaur R, Martina G, Erica S, Michael H,  
487     Tsugunori N, Tetsu H: Operational feasibility of using loop-mediated isothermal amplification  
488     for diagnosis of pulmonary tuberculosis in microscopy centers of developing countries.  
489     *Journal of Clinical Microbiology* 2007, 45:1936-1940.
- 490     17.    Wanyuan A, Stephen A, Evelyn W, Brian H, Larry R, Barry K, Robert J: Rapid detection of *rpoB*  
491     gene mutations conferring rifampin resistance in *Mycobacterium tuberculosis*. *Journal of*  
492     *Clinical Microbiology* 2012, 50:2433-2440.
- 493     18.    Boyle DS, Mcnerney R, Teng LH, Leader BT, Pérez-Osorio AC, Meyer JC, O'Sullivan DM, Brooks  
494     DG, Piepenburg O, Forrest MS: Rapid detection of *Mycobacterium tuberculosis* by

- 495 recombinase polymerase amplification. *PLoS One* 2014, 9:e103091.
- 496 19. Daher RK, Stewart G, Boissinot M, Boudreau DK, Bergeron MG: Influence of sequence  
497 mismatches on the specificity of recombinase polymerase amplification technology.  
498 *Molecular & Cellular Probes* 2015, 29:116-121.
- 499 20. Nguyen DTT, Lee EY, Koo B, Jin CE, Lee TY, Yong S: A microfluidic enrichment platform with a  
500 recombinase polymerase amplification sensor for pathogen diagnosis. *Analytical*  
501 *Biochemistry* 2017, 544:87-92.
- 502 21. Peng Z, Gao W, Huang H, Jiang J, Chen X, Fan J, Yan X: Rapid Detection of *Vibrio*  
503 *parahaemolyticus* in Shellfish by Real-Time Recombinase Polymerase Amplification. *Food*  
504 *Analytical Methods* 2018, 11:1-9.
- 505 22. Kersting S, Rausch V, Bier FF, Nickisch-Rosenegk MV: Multiplex isothermal solid-phase  
506 recombinase polymerase amplification for the specific and fast DNA-based detection of three  
507 bacterial pathogens. *Microchimica Acta* 2014, 181:1715-1723.
- 508 23. Mauk MG, Liu C, Sadik M, Bau HH: Microfluidic Devices for Nucleic Acid (NA) Isolation,  
509 Isothermal NA Amplification, and Real-Time Detection. *Methods in Molecular Biology* 2015,  
510 1256:15.
- 511 24. Yamanaka ES, Tortajada-Genaro LA, Maquieira Á: Low-cost genotyping method based on  
512 allele-specific recombinase polymerase amplification and colorimetric microarray detection.  
513 *Microchimica Acta* 2017, 184:1453-1462.
- 514 25. Liu X YQ, Huang J, Chen J, Guo Z, Liu Z, Cai L, Li R, Wang Y, Yang G, Lan Q.: Influence of design  
515 probe and sequence mismatches on the efficiency of fluorescent RPA. *World Journal of*  
516 *Microbiology and Biotechnology* 2019, 35:95.
- 517 26. Chen JS, Ma E, Harrington LB, Costa MD, Doudna JA: CRISPR-Cas12a target binding unleashes  
518 indiscriminate single-stranded DNase activity. *Science* 2018, 360:436-439.
- 519 27. Martin J, Krzysztof C, Ines F, Michael H, Doudna JA, Emmanuelle C: A programmable  
520 dual-RNA-guided DNA endonuclease in adaptive bacterial immunity. *Science* 2012,  
521 337:816-821.
- 522 28. Rodolphe B, Christophe F, H el ene D, Melissa R, Patrick B, Sylvain M, Romero DA, Philippe H:  
523 CRISPR provides acquired resistance against viruses in prokaryotes. *Science* 2007,  
524 315:1709-1712.
- 525 29. Ran FA, Hsu PD, Wright J, Agarwala V, Scott DA, Zhang F: Genome engineering using the  
526 CRISPR-Cas9 system. *Nature Protocols* 2013, 8:2281.
- 527 30. Le C, F Ann R, David C, Shuailiang L, Robert B, Naomi H, Hsu PD, Xuebing W, Wenyan J,  
528 Marraffini LA: Multiplex genome engineering using CRISPR/Cas systems. *Science* 2015,  
529 339:819-823.
- 530 31. Manguso RT, Pope HW, Zimmer MD, Brown FD, Yates KB, Miller BC, Collins NB, Bi K, Lafleur  
531 MW, Juneja VR: In vivo CRISPR screening identifies Ptpn2 as a cancer immunotherapy target.  
532 *Nature* 2017, 547:413.
- 533 32. Lu XJ, Xue HY, Ke ZP, Chen JL, Ji LJ: CRISPR-Cas9: a new and promising player in gene therapy.  
534 *Journal of Medical Genetics* 2015, 52:289-296.
- 535 33. Gootenberg JS AO, Lee JW, Essletzbichler P, Dy AJ, Joung J, Verdine V, Donghia N, Daringer NM,  
536 Freije CA, Myhrvold C, Bhattacharyya RP, Livny J, Regev A, Koonin EV, Hung DT, Sabeti PC,  
537 Collins JJ, Zhang F.: Nucleic acid detection with CRISPR-Cas13a/C2c2. *Science* 2017,  
538 356:438-442.

- 539 34. Gootenberg JS, Abudayyeh OO, Kellner MJ, Joung J, Collins JJ, Zhang F: Multiplexed and  
540 portable nucleic acid detection platform with Cas13, Cas12a, and Csm6. *Science* 2018,  
541 360:439-444.
- 542 35. Harrington LB, Burstein D, Chen JS, Paez-Espino D, Ma E, Witte IP, Cofsky JC, Kyrpides NC,  
543 Banfield JF, Doudna JA: Programmed DNA destruction by miniature CRISPR-Cas14 enzymes.  
544 *Science* 2018, 362:839-842.
- 545 36. Collins D M SDM: Identification of an insertion sequence, IS1081, in *Mycobacterium bovis*.  
546 *FEMS Microbiology Letters* 1991, 83:11-16.
- 547 37. Ma Q, Liu H, Ye F, Xiang G, Shan W, Xing W: Rapid and visual detection of *Mycobacterium*  
548 tuberculosis complex using recombinase polymerase amplification combined with lateral flow  
549 strips. *Molecular & Cellular Probes* 2017, 36:43-49.
- 550



551 **Table 1. The oligonucleotide sequences of RPA primers, gRNA and non-specific**  
 552 **single strand DNA for MTB Cas12a/gRNA trans-cleavage assay**

| Name                | Sequence (5' → 3')                                |
|---------------------|---------------------------------------------------|
| <b>RPA-F</b>        | CCAAGCTGCGCCAGGGCAGCTATTTCCCGGAC                  |
| <b>RPA-R</b>        | TTGGCCATGATCGACACTTGCGACTTGGA                     |
| <b>IS1081-gRNA*</b> | UAAUUUCUACUAAGUGUAGAU <u>GACCAGGCGCUCCAUCCGGC</u> |
| <b>ssDNA</b>        | GCTTGTGGCCGTTTACGTCGCCGTCCAGCTCGACCAGGAT          |
| <b>(Non-target)</b> | GGGCACCACCCCGGCTTTTTTTTTTTTTTTTTTTTTTTTTTTT       |
| <b>ssDNA-FQ</b>     | FAM-TTTTT-BHQ1                                    |

553 \* The underlined sequence is the specific sequence targeting insert sequence IS1081  
 554 of MTB; RPA-F and RPA-R are the forward and reverse primers of RPA, respectively.  
 555 And ssDNA-FQ was used in the Cas12a/gRNA trans-cleavage fluorescence assay

556

557 **Table 2. Clinical diagnostic performance of MTB-Cas12a assay on clinical**  
 558 **samples**

|                |          | MTB-Cas12a assay |          |       |
|----------------|----------|------------------|----------|-------|
|                |          | Positive         | Negative | Total |
| Culture Method | Positive | 139              | 1        | 140   |
|                | Negative | 0                | 53       | 53    |
| Total          |          | 139              | 54       | 193   |

559

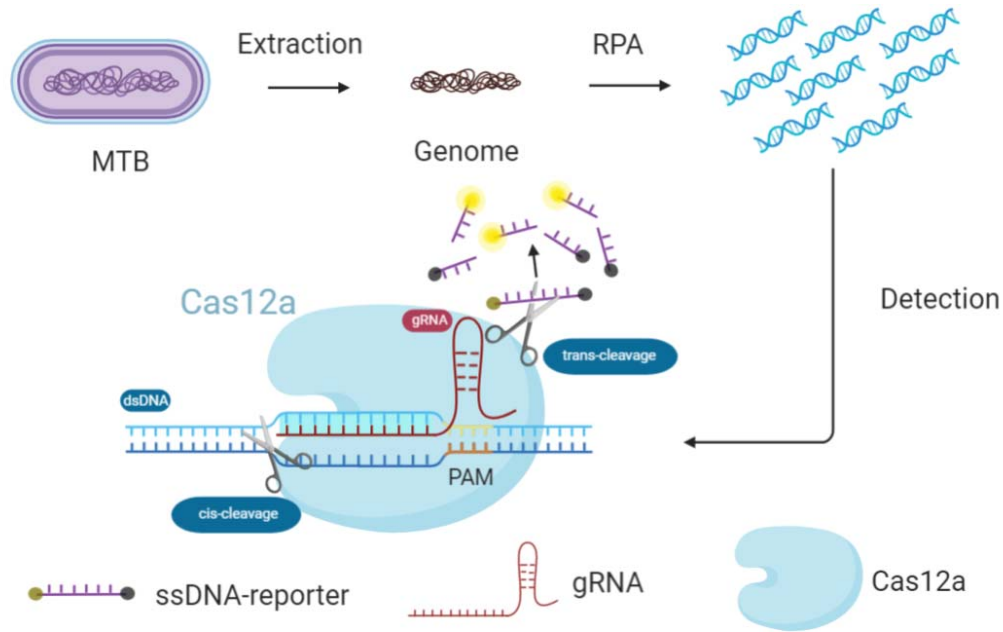

560

561 **Figure 1. Schematic diagram of the Cas12a/gRNA trans cleavage fluorescence**  
562 **signal amplification system for MTB detection.**

563 Genome of mycobacterium tuberculosis complex (MTB) was extracted into RPA

564 reaction for amplification. Positive fluorescent signals were captured when probes

565 were cleaved by activated Cas12a under target with PAM sequence at 5' end that

566 recognized by gRNA.

567

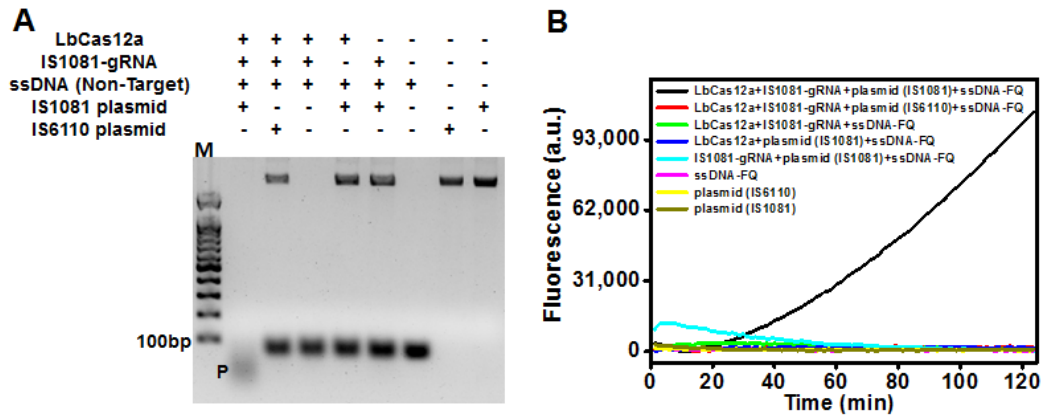

568

569 **Figure 2. Feasibility analysis of Cas12a/gRNA system for MTB detection.**

570 4% agarose gel electrophoretic analysis of the feasibility of Cas12a/gRNA system for

571 MTB detection. 79 nt ssDNA (Non-Target) as substrate of Cas12a/gRNA trans

572 cleavage (Figure 2A); Real-time fluorescence of Cas12a/gRNA fluorescence assay.

573 ssDNA-FQ was served as the reporter probe. The concentration of the reaction

574 components was as follows: 50nM purified LbCas12a, 36 nM IS1081-gRNA, 50 nM

575 ssDNA (Non-Target) or ssDNA-FQ, 80 ng IS1081 or IS6110 plasmid (Figure 2B).

576

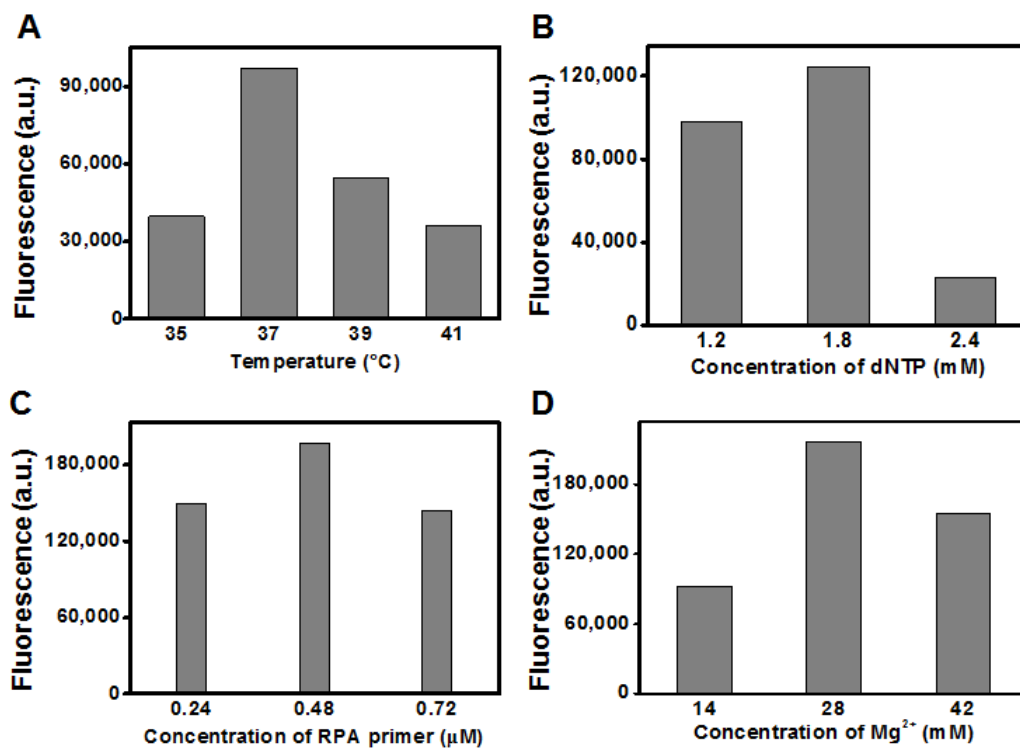

577

578 **Figure 3. Optimization of MTBC-Cas12a trans-cleavage fluorescence assay.**

579 Figure 3A, Figure 3B, Figure 3C and Figure 3D are optimized results of assay on

580 reaction temperature, dNTP concentration, primers concentration, and Mg<sup>2+</sup>

581 concentration, respectively.

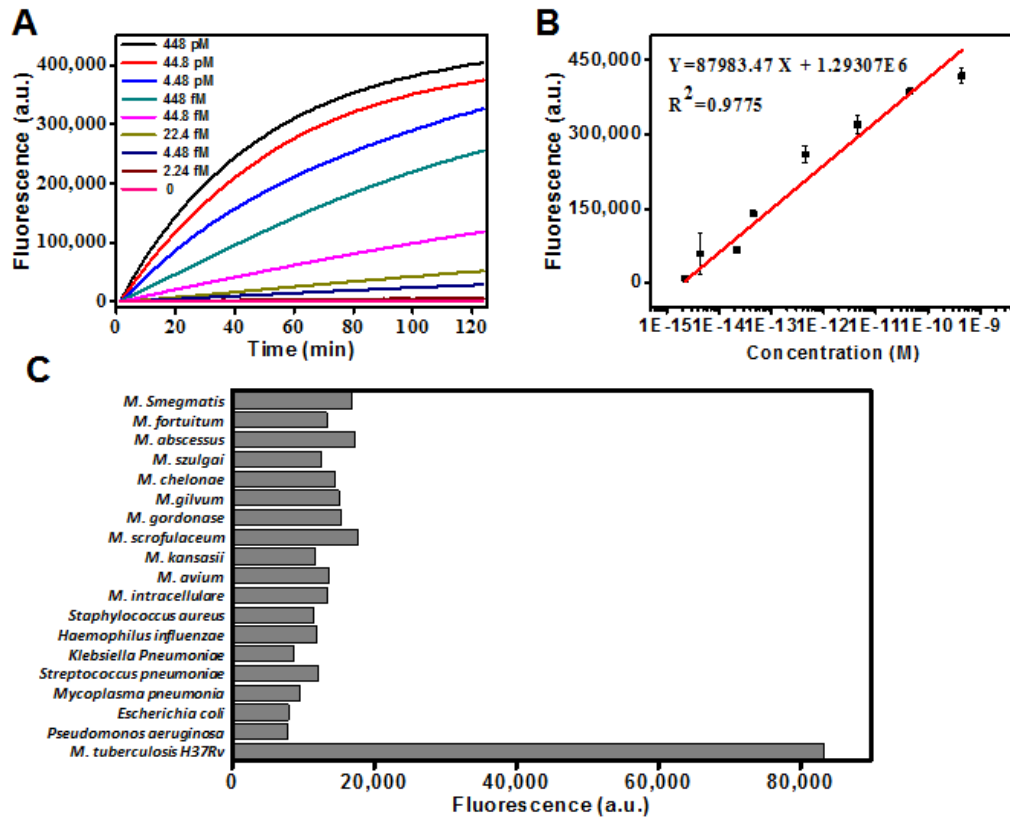

582

583 **Figure 4. Detection performance of MTB-Cas12a fluorescence assay.**

584 Real-time fluorescence intensity alteration of MTB-Cas12a assay of different

585 concentration of target(Figure 4A); The calibration plots of fluorescence intensity

586 versus the logarithm of target concentration(Figure 4B); The specificity of the

587 MTB-Cas12a fluorescence assay, including NTM and other pathogens of respiratory

588 tract(Figure 4C).
